# Supplementary material for: Molecular actions of different functional oligosaccharides on intestinal integrity, immune function and microbial community in weanling pigs
Source: Royal Society of Chemistry journal article supplement (doi:10.1039/d2fo02243e), 2022-01-01
Supplement: d2fo02243e1.pdf [file d2fo02243e1.pdf]

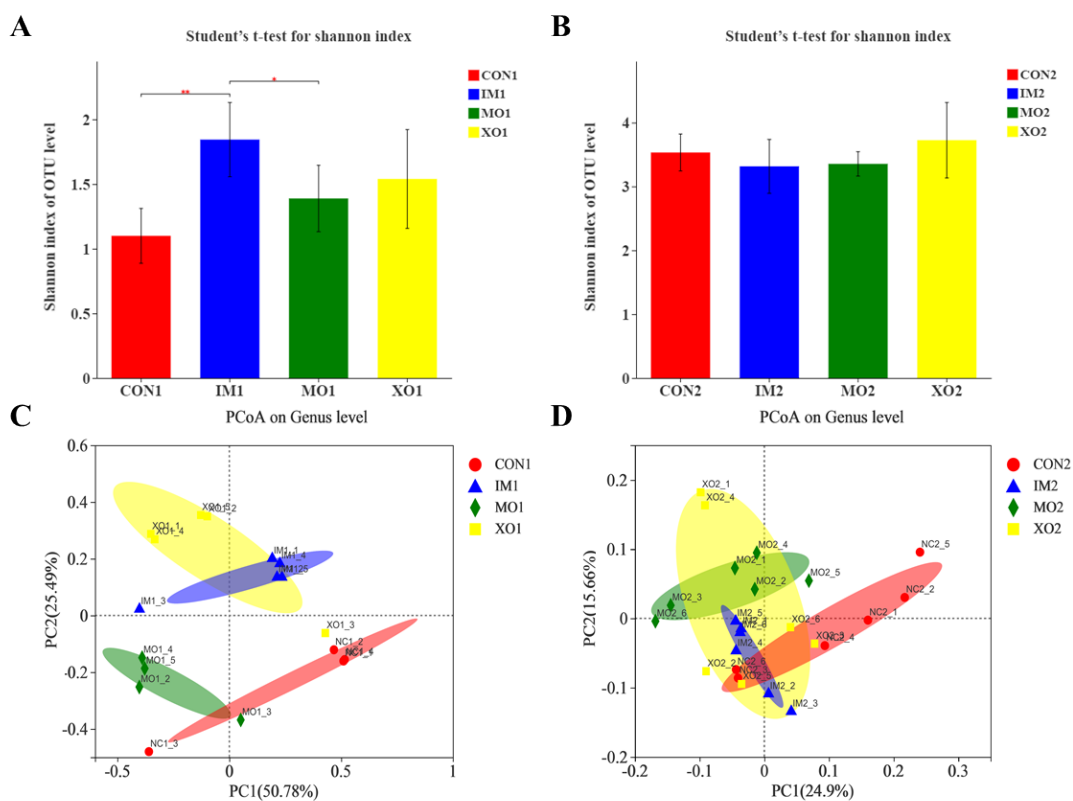

**Supplementary Figure S1.** Effects of different functional oligosaccharides on intestinal microbial diversity in weanling piglets. (A) Ileal microbial  $\alpha$ -diversity; (B) Colonic microbial  $\alpha$ -diversity, (C) Ileal microbial  $\beta$ -diversity; (D) Colonic microbial  $\beta$ -diversity. CON, a control diet; XO, xylo-oligosaccharide diet; IM, isomaltose-oligosaccharide diet; MO, mannan-oligosaccharide diet; d, day. (n = 6) \* means a significant difference ( $p < 0.05$ ).

**A**

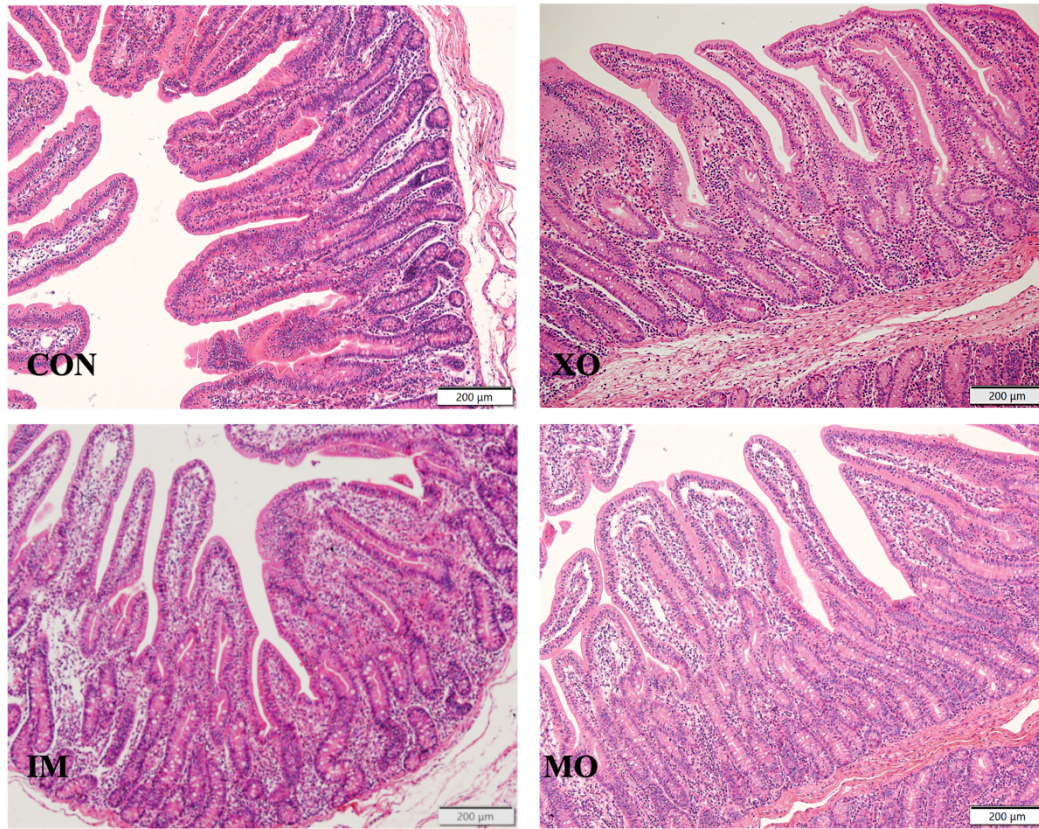

**Supplementary Figure S2.** Effects of different functional oligosaccharides on intestinal morphology in weanling pigs. (A) Jejunal morphology.

CON, a control diet; XO, xylo-oligosaccharide diet; IM, isomaltose-oligosaccharide diet; MO, mannan-oligosaccharide diet. n = 6 for each group.

Supplementary Table S1. Composition and nutrient levels of the experimental diets (% as-fed basis).

| Items                                    | CON   |
|------------------------------------------|-------|
| Corn                                     | 56.45 |
| Soybean meal                             | 12.50 |
| Whey powder                              | 10.00 |
| Fish meal                                | 4.00  |
| Soy protein concentrate                  | 5.00  |
| Extruded full-fat soybean                | 5.00  |
| Sucrose                                  | 2.00  |
| Soybean oil                              | 1.30  |
| Dicalcium phosphate                      | 1.20  |
| Limestone                                | 0.75  |
| NaCl                                     | 0.20  |
| L-Lysine-HCl                             | 0.45  |
| DL-Methionine                            | 0.20  |
| L-Threonine                              | 0.15  |
| L-Tryptophan                             | 0.10  |
| L-Valine                                 | 0.20  |
| Vitamins and trace minerals <sup>1</sup> | 0.50  |
| Nutrient levels, %                       |       |
| Digestible energy, MJ/kg <sup>2</sup>    | 14.80 |
| Crude protein                            | 18.80 |
| Total dietary fiber                      | 16.27 |
| Soluble dietary fiber                    | 1.97  |
| Insoluble dietary fiber                  | 14.30 |
| Calcium                                  | 0.80  |
| Phosphorus                               | 0.65  |

Notes: <sup>1</sup>Premix provided the following per kilogram of feed: vitamin A, 10,000 IU; vitamin D<sub>3</sub>, 2,500 IU; vitamin E, 30 IU; vitamin K<sub>3</sub>, 3 mg; vitamin B<sub>1</sub>, 2.5 mg; vitamin B<sub>2</sub>, 4.0 mg; vitamin B<sub>6</sub>, 3.0 mg; vitamin B<sub>12</sub>, 12 µg; nicotinic acid, 40 mg; thiamine, 3 mg; Riboflavin, 6 mg; D-pantothenic acid, 15 mg; folic acid, 1.2 mg; biotin, 50 µg; Fe, 90.0 mg; Zn, 75.0 mg; Mn, 40.0 mg; I, 0.35 mg; Se, 0.3 mg.

<sup>2</sup>Calculated Values.

**Supplementary Table S2.** All the primers sequences of target genes used for qRT-PCR assays.

| <b>Target gene Primer forward/reverse Primer sequence (5'→3')</b> |         |                             |
|-------------------------------------------------------------------|---------|-----------------------------|
| Mucin 1                                                           | Forward | GTGCCGACGAAAGAACTG          |
|                                                                   | Reverse | TGCCAGGTTTCGAGTAAGAG        |
| Mucin2                                                            | Forward | CTGTGTGGGGCCTGACAA          |
|                                                                   | Reverse | AGTGCTTGCAGTCGAACTCA        |
| ZO-1                                                              | Forward | GCCATCCACTCCTGCCTAT         |
|                                                                   | Reverse | CGGGACCTGCTCATAACTTC        |
| Occludin                                                          | Forward | CAGCAGCAGTGGTAACTTGG        |
|                                                                   | Reverse | ATAGTGGTCAGGGTCCGTCCTC      |
| Claudin-1                                                         | Forward | AAGGACAAAACCGTGTGGGA        |
|                                                                   | Reverse | CTCTCCCCACATTCGAGATGAT<br>T |
| Claudin-2                                                         | Forward | GCTGGCGAACGAGTTCTTAC        |
|                                                                   | Reverse | AGATGGCGCTAGATGTCACC        |
| Claudin-4                                                         | Forward | TCAGCCCTGACTTTGCGTG         |
|                                                                   | Reverse | ACCTGTCTGTCCACACCAC         |
| TNF- $\alpha$                                                     | Forward | CCACGCTCTTCTGCCTACTGC       |
|                                                                   | Reverse | TCGGCTTTGACATTGGCTACAA      |
| IL-1 $\beta$                                                      | Forward | CCGCCAAGATATAACTGAC         |
|                                                                   | Reverse | GCAGCAACCATGTACCAA          |
| IL-6                                                              | Forward | AATGCTCTTCACCTCTCC          |
|                                                                   | Reverse | CACACTTCTCATACTTCTCAC       |
| IL-10                                                             | Forward | ACCTGGTAGAAGTGATGCC         |
|                                                                   | Reverse | CAAGGAGTTGTTCCGTTA          |
| pBD-1                                                             | Forward | TGCCACAGGTGCCGATCT          |
|                                                                   | Reverse | CTGTTAGCTGCTTAAGGAA         |
| pBD-2                                                             | Forward | CCAGAGGTCCGACCACTACA        |
|                                                                   | Reverse | GGTCCCTTCAATCCTGTTGAA       |
| GAPDH                                                             | Forward | TGGTGAAGGTCGGAGTGAAC        |
|                                                                   | Reverse | GGAAGATGGTGATGCGATTTC       |
